# Supplementary material for: One dimensional CdS based materials for artificial photoredox reactions
Source: Royal Society of Chemistry journal article supplement (doi:10.1039/c6ta06373j), 2016-12-15
Supplement: c6ta06373j1.pdf [file c6ta06373j1.pdf]

## *Electronic Supplementary Information*

# One dimensional CdS based materials for artificial photoredox reactions

Zi-Rong Tang,<sup>a\*</sup> Bin Han,<sup>a</sup> Chuang Han,<sup>a,b</sup> and Yi-Jun Xu<sup>a,b</sup>

<sup>a</sup> College of Chemistry, New Campus, Fuzhou University, Fuzhou, 350116, P.R. China. Tel. /Fax: +86 591 22866126 \*E-mail: [zrtang@fzu.edu.cn](mailto:zrtang@fzu.edu.cn)

<sup>b</sup> State Key Laboratory of Photocatalysis on Energy and Environment, College of Chemistry, Fuzhou University, Fuzhou, 350002, P.R. China. Tel. /Fax: +86 591 83779326

**Table S1** Summary of MoS<sub>2</sub>-1D CdS hybrid photocatalysts

| Structure                                          | H <sub>2</sub> evolution rate               | Enhancement factor <sup>a</sup> | AQY (λ=420nm) | Sacrificial agents  | Reference |
|----------------------------------------------------|---------------------------------------------|---------------------------------|---------------|---------------------|-----------|
| ultrathin MoS <sub>2</sub> NSs-CdS NWs             | 95.7 mmol·g <sup>-1</sup> ·h <sup>-1</sup>  | —                               | 46.90%        | 20 vol% lactic acid | 191       |
| MoS <sub>2</sub> -tip-CdS NRs                      | 8.44 mmol·g <sup>-1</sup> ·h <sup>-1</sup>  | 92                              | 22.20%        | 28 vol% lactic acid | 192       |
| partially crystalline MoS <sub>2</sub> NSs-CdS NRs | 49.80 mmol·g <sup>-1</sup> ·h <sup>-1</sup> | 130.26                          | 41.37%        | 10 vol% lactic acid | 193       |
| MoS <sub>2</sub> -CdS core shell NWs               | 24.65 mmol·g <sup>-1</sup> ·h <sup>-1</sup> | 64                              | 28.50%        | 10 vol% lactic acid | 194       |
| Metallic 1T phase MoS <sub>2</sub> NSs-CdS NRs     | 39.75 mmol·g <sup>-1</sup> ·h <sup>-1</sup> | 35                              | —             | 10 vol% lactic acid | 195       |

<sup>a</sup> refers to the enhancing times of photocatalytic H<sub>2</sub> production rate of 1D CdS-MoS<sub>2</sub> composites compared to that of pure CdS.

**Table S2** Brief summary of various kind of CdS-cocatalysts towards photocatalytic H<sub>2</sub> evolution

| Photocatalyst                           | H <sub>2</sub> evolution rate               | Enhancement factor <sup>a</sup> | AQY (λ nm)   | Sacrificial agents                                           | Ref.(Year) |
|-----------------------------------------|---------------------------------------------|---------------------------------|--------------|--------------------------------------------------------------|------------|
| MoS <sub>2</sub> -CdS NWs               | 95.7 mmol·g <sup>-1</sup> ·h <sup>-1</sup>  | —                               | 46.90% (420) | 20 vol% lactic acid                                          | 191 (2016) |
| MoS <sub>2</sub> -CdS NRs               | 8.44 mmol·g <sup>-1</sup> ·h <sup>-1</sup>  | 92                              | 22.20% (420) | 28 vol% lactic acid                                          | 192 (2016) |
| MoS <sub>2</sub> -CdS NRs               | 49.80 mmol·g <sup>-1</sup> ·h <sup>-1</sup> | 130.26                          | 41.37% (420) | 10 vol% lactic acid                                          | 193 (2016) |
| MoS <sub>2</sub> -CdS NWs               | 24.65 mmol·g <sup>-1</sup> ·h <sup>-1</sup> | 64                              | 28.50% (420) | 10 vol% lactic acid                                          | 194 (2017) |
| MoS <sub>2</sub> -CdS NRs               | 39.75 mmol·g <sup>-1</sup> ·h <sup>-1</sup> | 35                              | —            | 10 vol% lactic acid                                          | 195 (2016) |
| WS <sub>2</sub> -CdS NRs                | 61.1 mmol·g <sup>-1</sup> ·h <sup>-1</sup>  | —                               | 28.9% (420)  | 20 vol% lactic acid                                          | 178 (2016) |
| NiS-CdS NRs                             | 1131 μmol·g <sup>-1</sup> ·h <sup>-1</sup>  | 20                              | 6.1% (420)   | 0.35 M S <sup>2-</sup> -0.25 M SO <sub>3</sub> <sup>2-</sup> | 177 (2013) |
| Cu <sub>x</sub> S-CdS NRs               | 111 μmol·mg <sup>-1</sup> ·h <sup>-1</sup>  | 4                               | 7% (420)     | 0.75 M S <sup>2-</sup> -1.05 M SO <sub>3</sub> <sup>2-</sup> | 174 (2016) |
| CuS-CdS NRs                             | 332 μmol·g <sup>-1</sup> ·h <sup>-1</sup>   | 3.5                             | —            | 0.35 M S <sup>2-</sup> -0.25 M SO <sub>3</sub> <sup>2-</sup> | 179 (2013) |
| Ni <sub>2</sub> P-CdS NRs               | 553 μmol·mg <sup>-1</sup> ·h <sup>-1</sup>  | 22                              | 41% (450)    | 0.75 M S <sup>2-</sup> -1.05 M SO <sub>3</sub> <sup>2-</sup> | 196 (2015) |
| Cu <sub>3</sub> P-CdS NRs               | 184 μmol·mg <sup>-1</sup> ·h <sup>-1</sup>  | 6.5                             | 25% (450)    | 0.75 M S <sup>2-</sup> -1.05 M SO <sub>3</sub> <sup>2-</sup> | 166 (2015) |
| Fe <sub>2</sub> P-CdS NRs               | 186 μmol·mg <sup>-1</sup> ·h <sup>-1</sup>  | 30                              | 15% (450)    | 0.5 M ascorbic acid                                          | 169 (2016) |
| MoP-CdS NRs                             | 163 μmol·g <sup>-1</sup> ·h <sup>-1</sup>   | 20                              | 5.6% (450)   | 10 vol% lactic acid                                          | 170 (2015) |
| Co <sub>2</sub> P-CdS NRs               | 19.4 mmol·g <sup>-1</sup> ·h <sup>-1</sup>  | 20                              | 6.8% (LEDs)  | 0.5 M DL-mandelic acid                                       | 168 (2016) |
| Ni <sub>3</sub> N-CdS NRs               | 510 μmol·g <sup>-1</sup> ·h <sup>-1</sup>   | 10                              | 13% (420)    | 0.75 M S <sup>2-</sup> -1.05 M SO <sub>3</sub> <sup>2-</sup> | 181 (2016) |
| Ni <sub>x</sub> B-CdS NRs               | 4.8 mmol·g <sup>-1</sup> ·h <sup>-1</sup>   | 20                              | 21% (420)    | 10 vol% lactic acid                                          | 182 (2015) |
| Co <sub>3</sub> O <sub>4</sub> -CdS NRs | 236 μmol·g <sup>-1</sup> ·h <sup>-1</sup>   | 33                              | —            | 0.5 M S <sup>2-</sup> -0.5 M SO <sub>3</sub> <sup>2-</sup>   | 155 (2015) |
| Ni(OH) <sub>2</sub> -CdS NRs            | 101.6 mmol·g <sup>-1</sup> ·h <sup>-1</sup> | 146                             | 28% (420)    | 25 vol % TEOA                                                | 161 (2011) |
| Co(OH) <sub>2</sub> -CdS NRs            | 61.1 μmol·g <sup>-1</sup> ·h <sup>-1</sup>  | 41                              | —            | 25 vol % ethanol                                             | 162 (2014) |
| Co(OH) <sub>2</sub> -CdS NRs            | 14.43 mmol·g <sup>-1</sup> ·h <sup>-1</sup> | 206                             | 6.09         | 25 vol% TEOA                                                 | 163 (2016) |
| Co-Pi-CdS NRs                           | 13.3 mmol·g <sup>-1</sup> ·h <sup>-1</sup>  | 2.6                             | 24.3% (420)  | lactic acid solution                                         | 40 (2016)  |
| Ni-CdS NRs                              | 63 mmol·g <sup>-1</sup> ·h <sup>-1</sup>    | —                               | 53 % (475)   | 10 vol % ethanol                                             | 57 (2014)  |
| Ni-CdS NRs                              | 25.85 mmol·g <sup>-1</sup> ·h <sup>-1</sup> | —                               | 26.8% (420)  | 1 M (NH <sub>4</sub> ) <sub>2</sub> SO <sub>3</sub>          | 138 (2015) |
| Pt-CdSe@CdS NRs                         | —                                           | —                               | 100% (455)   | IPA                                                          | 130 (2016) |
| Pt-CdS NWs                              | 29.8 mmol·g <sup>-1</sup> ·h <sup>-1</sup>  | 75                              | 67.1% (420)  | 10 vol% lactic acid                                          | 119 (2013) |
| Pt-CdS NRs                              | 16.27 mmol·g <sup>-1</sup> ·h <sup>-1</sup> | 8                               | —            | 10 vol% lactic acid                                          | 122 (2016) |
| FeP-CdS NPs                             | 202 μmol·mg <sup>-1</sup> ·h <sup>-1</sup>  | —                               | 35% (520)    | 10 vol% lactic acid                                          | 165 (2016) |
| MoS <sub>2</sub> -CdS NPs               | 5.4 mmol·g <sup>-1</sup> ·h <sup>-1</sup>   | 36                              | —            | 10 vol% lactic acid                                          | 188 (2008) |
| NiS-CdS NPs                             | 7.19 mmol·g <sup>-1</sup> ·h <sup>-1</sup>  | 35                              | 51.3% (420)  | 30 vol% lactic acid                                          | 173 (2010) |
| Pt-PdS/CdS NPs                          | 28.9 mmol·g <sup>-1</sup> ·h <sup>-1</sup>  | 359.56                          | 93 % (420)   | 0.5 M S <sup>2-</sup> -0.5 M SO <sub>3</sub> <sup>2-</sup>   | 203 (2009) |

<sup>a</sup> refers to the enhancing times of photocatalytic H<sub>2</sub> production rate of 1D CdS-cocatalyst composites compared to that of pure CdS.
